# Supplementary material for: RRM2 as a Key Biomarker and Therapeutic Target in Letrozole-Resistant ER+ Breast Cancer: Insights from Bioinformatics and Molecular Docking
Source: Research Square preprint supplement (doi:10.21203/rs.3.rs-6183643/v1), 2025-03-31
Supplement: Supplementary file 1 [file 50d9c879f0ff3214722148e9.docx]

**Research Paper**

**Title:**

**RRM2 as a Key Biomarker and Therapeutic Target in Letrozole-Resistant ER+ Breast Cancer: Insights from Bioinformatics and Molecular Docking**

**Running Title:**

**RRM2-Mediated Letrozole Resistance in ER+ Breast Cancer**

**Authors:**

Wan-Yu Hung, M.D.1,2,3

Shih-Chun Huang, M.S.2

Cheng-Chan Yu, M.D.1,4
Shou-Tung Chen, M.D.5

Chi-Chen Lin, Ph.D.3,6*

Ming-Hon Hou, Ph.D.2,3,6*

Breast Cancer Genomics and Therapy Consortium7
*** Chi-Chen Lin and Ming-Hon Hou contributed equally as corresponding authors**

**Author Affiliations:**

1. Department of General Surgery of Taichung Tzu Chi Hospital, Buddhist Tzu Chi Medical Foundation, Taichung, Taiwan.
2. Graduate Institute of Genomics and Bioinformatics, National Chung-Hsing University, Taiwan.
3. Ph.D. Program in translational medicine, National Chung Hsing University, Taichung, Taiwan.
4. Graduate Institute of Integrated Medicine, China Medical University, Taichung, Taiwan.
5. Comprehensive Breast Cancer Center, Changhua Christian Hospital, Changhua, Taiwan.
6. Graduate Institute of Biomedical Science, National Chung-Hsing University, Taichung, Taiwan.
7. Breast Cancer Genomics and Therapy Consortium: Wan-Yu Hung, Shih-Chun Huang, Cheng-Chan Yu, Shou-Tung Chen, Chi-Chen Lin, Ming-Hon Hou

***Corresponding Authors:**

Ming-Hon Hou, Ph.D. (Dr. Hou is the nominated representative for the consortium)

Institute of Genomics and Bioinformatics, National Chung-Hsing University, Taiwan.

40227No.145 Xingda Rd., South Dist., Taichung, Taiwan, R.O.C. 402

Email: [mhho@nchu.edu.tw](mailto:mhho@nchu.edu.tw)

Phone: +886(4)22840338 ext. 7011

Chi-Chen Lin, Ph.D.
Institute of Biomedical Science, National Chung-Hsing University, Taichung, Taiwan.

40227No.145 Xingda Rd., South Dist., Taichung, Taiwan, R.O.C. 402(College of Life Sciences,National Chung Hsing University)

Email: [chichenlin1@gmail.com](mailto:chichenlin1@gmail.com)

Phone: +886(4)22840896 ext. 132


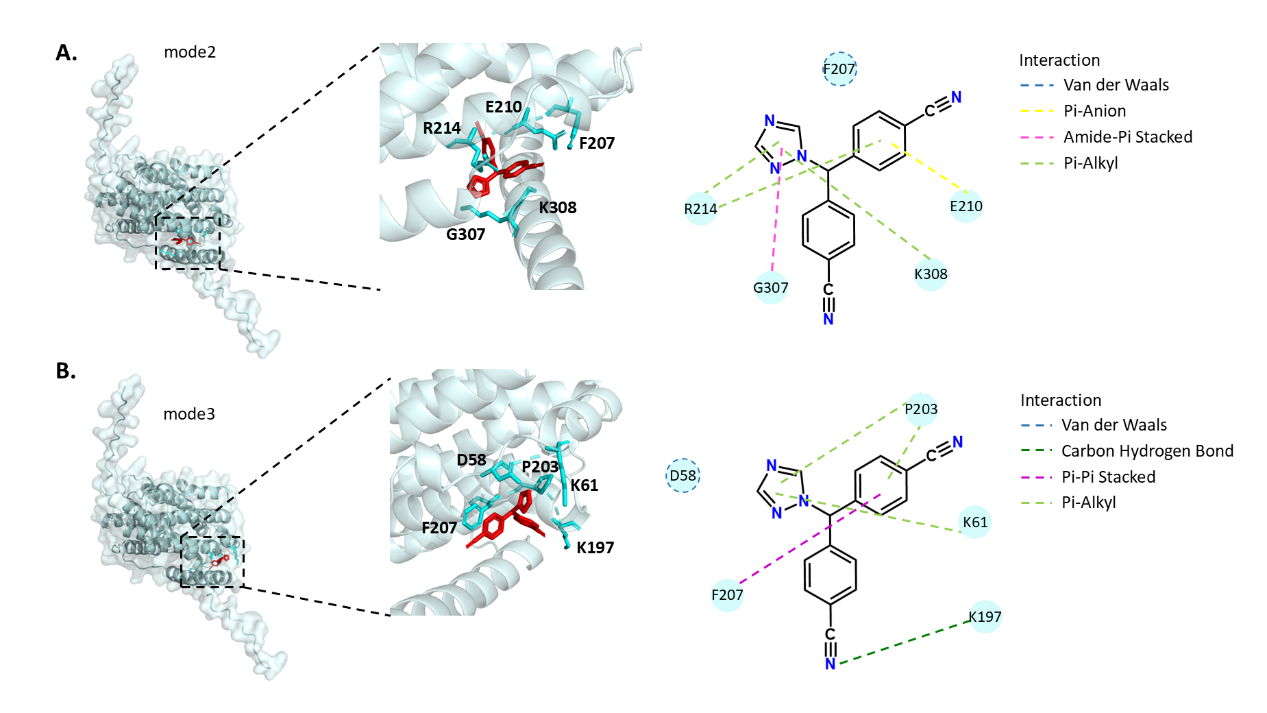


**Figure Supplementary 1. The detailed interactions with RRM2 and Letrozole were analyzed using Discovery Studio.** (A) The interactions of top 2. (B)The interactions of top 3.
